# Supplementary material for: Camrelizumab plus pemetrexed disodium and carboplatin combined with thalidomide as first-line therapy for advanced, non-squamous non-small cell lung cancer: a prospective, single-arm, pilot study
Source: Research Square preprint supplement (doi:10.21203/rs.3.rs-7506192/v1), 2025-10-22
Supplement: Supplementary file 1 [file db78db9730ddf196b4e81d0a.docx]

**Exclusion Criteria**

- Prior systemic chemotherapy for advanced (metastatic) tumor;
- Progression within 6 months after completion of radiotherapy or neoadjuvant chemotherapy or adjuvant cytotoxic chemotherapy (or both);
- Allergic to any drugs in the regime, or hypersensitivity, or with autoimmune diseases;
- Presence of third space fluid (e.g., large pleural effusion and ascites) that cannot be controlled by drainage or other methods;
- Chronic corticosteroid treatment (＞50 days) or requirement for prolonged corticosteroid therapy;
- Symptomatic untreated brain metastases or psychiatric conditions compromising symptom reporting accuracy;
- Concurrent any other anti-tumor therapy, including anti-tumor Chinese herbal medicine and immune preparations;
- Impaired drug absorption due to dysphagia, chronic diarrhea, intestinal obstruction, or other gastrointestinal disorders;
- Other malignant tumors within 5 years prior to the enrollment, and previous treatment for the malignant tumors except for carcinoma in situ of the cervix or squamous or basal cell carcinoma of the skin;
- Pregnant or lactating women, those of childbearing potential but refuse to take contraceptive measures;
- Significant heart disease or heart disease history, including congestive heart failure, high-risk uncontrolled arrhythmias, angina requiring medication, clinically diagnosed with valvular heart disease, severe myocardial infarction, and resistant hypertension;
- Previous allogeneic tissue/solid organ transplantation;
- Clinically significant uncontrolled comorbidities seriously endangering the safety of patients or affecting the completion of the study (such as uncontrolled hypertension, diabetes, thyroid disease, etc.);
- Other conditions judged by the investigator to be inappropriate for inclusion in the study.

**Termination Criteria**

- Death or loss to follow-up
- Disease progression confirmed by imaging (e.g. CT, MRI, ECT, etc.) or investigator-assessed clinical progression (with documented rationale for progression determination);
- Pregnancy occurrence during the study;
- Persistent intolerable toxicity after two dose adjustments or treatment suspensions;
- Voluntary withdrawal requested by the participant or legal representative;
- Other investigator-determined reasons necessitating discontinuation (with detailed documentation of withdrawal rationale).

**Withdrawal Criteria**

- Failure to complete at least 1 cycle of clinical trial research according to this protocol due to factors unrelated to the investigational drug, and inability to evaluate safety and efficacy
